# Supplementary material for: Nationwide Laboratory Surveillance of Progressive Multifocal Leukoencephalopathy in Japan: Fiscal Years 2011–2020
Source: MDPI journal article supplement (doi:10.3390/v15040968), 2023-04-14
Supplement: s1 [file s1]

**Supplementary Table S1.** Underlying disease categories and detection rates in areas with high proportions of patients with JCV-positive CSF

| Category                | No. (%) of JCV-positive cases <sup>a</sup> |        |              |        | <i>P</i> -value <sup>b</sup> |
|-------------------------|--------------------------------------------|--------|--------------|--------|------------------------------|
|                         | Clusters 1–2                               |        | Clusters 3–5 |        |                              |
| HIV infection           | 12/25                                      | (48.0) | 45/185       | (24.3) | 0.017 *                      |
| Hematological disorders | 29/70                                      | (41.4) | 49/235       | (20.9) | <0.001 *                     |
| Autoimmune disorders    | 16/46                                      | (34.8) | 59/285       | (20.7) | 0.055                        |
| Organ transplantation   | 0/5                                        | (0)    | 12/42        | (28.6) | 0.308                        |
| Solid organ tumors      | 2/10                                       | (20.0) | 6/80         | (7.5)  | 0.216                        |
| Other diseases          | 12/27                                      | (44.4) | 28/144       | (19.4) | 0.011 *                      |
| None/unknown            | 3/33                                       | (9.1)  | 15/350       | (4.3)  | 0.195                        |
| Total                   | 74/216                                     | (34.3) | 214/1321     | (16.2) | <0.001 *                     |

Abbreviations: CSF, cerebrospinal fluid; HIV, human immunodeficiency virus; JCV, JC virus.

<sup>a</sup> Number of CSF JCV-positive cases and positive rates (%) in the clusters shown in Figure 2D.

<sup>b</sup> The positive rates of CSF JCV in clusters 1–2 and 3–5 are statistically analyzed using Fisher’s exact test. Significant differences are indicated by asterisks ( $P < 0.05$ ).
